# Supplementary material
Source: publisher site journal article supplement (https://www.dovepress.com/article/362101)
Supplement: Supplementary file 1 [file get_supplementary_file.php]

**Supplementary Information**

**Supplementary Methods:**

**The Details of Polysomnography**

The study was conducted in an accredited sleep laboratory. In the sleep lab, the sleep schedule was regulated, with a “lights-out” time of 12:00 pm and a “lights-on” time of 8:00 am. Participants were not permitted to sleep before lights-out time or sleep past lights-on time. Polysomnography (PSG) consisted of electroencephalograms (C4-A1, O2-A1), right and left electrooculograms, electrocardiogram (ECG), submental and anterior tibial electromyograms, thoracic and abdominal respiratory movements, pulse oxygen saturation, end-tidal and transcutaneous carbon dioxide, oronasal airflow, and nasal pressure. Studies were recorded on an E-series Sleep System (Compumedics, Melbourne, VIC, Australia) and included digital video and audio monitoring.

Studies were scored at a centralized sleep reading center (People’s Hospital of Xinjiang Uygur Autonomous Region, Urumqi, Xinjiang, China) by registered polysomnographic technologists. Sleep and arousals were staged using standard criteria 1. Sleep stages were scored using 30-s epochs according to Rechtschaffen and Kales criteria 2, 3, and sleep architecture variables were noted as percent total sleep time for stages NREM 1, NREM 2, NREM 3, and REM sleep. Arousals were scored according to published guidelines and summarized as the total number of arousals per hour of sleep (arousal index) 4.

To enable the calculation of alternative definitions of the apnea-hypopnea index (AHI), respiratory events were initially identified by changes in signal amplitude only. Specifically, apneas were identified as complete reductions in the thermocouple signal for ≥10 seconds and hypopneas as approximately 30% reductions in the nasal pressure or inductance signals for ≥10 seconds. Each event was annotated as to its associated oxygen saturation nadir and whether it resulted in an EEG arousal. Supplement Table S1 provides definitions for the main AHI derivations.

**Table S1.** Definitions of respiratory events.

| Term | Definition |
| --- | --- |
| Apnea | Apnoea was defined as a 90% decrease in airflow lasting for at least 10 seconds. |
| Hypopnea | Hypopneas were defined by ≥ 30% decrement in the amplitude of nasal pressure flow signal for at least 10 seconds, associated with a 4% arterial oxygen desaturation (with or without arousal). |
| AHI | Apnea-hypopnea index = the number of apneas and hypopneas per hours of sleep |

**Table S2** The variance inflation factor (VIF) of all preliminary variables in the ordinary least squares (OLS) model.

| Variable | Step 1 | Step 2 |
| --- | --- | --- |
| TyG-WC | 11.4 | 4.1 |
| Gender | 2.8 | 2.8 |
| Age | 1.7 | 1.7 |
| eGFR | 2.7 | 2.7 |
| BMI | 3.1 | 2.8 |
| Diabetes | 1.7 | 1.7 |
| Smoking status | 1.6 | 1.5 |
| Drinking status | 1.4 | 1.4 |
| SBP | 2.2 | 2.2 |
| DBP | 2.5 | 2.5 |
| Cr | 5.3 | NA |
| TC | 1.9 | 1.9 |
| TG | 4.5 | 2.0 |
| HDL-c | 1.4 | 1.3 |
| LDL-c | 1.7 | 1.7 |
| FPG | 2.6 | 2.0 |
| Hcy | 1.0 | 1.0 |
| AHI | 6.6 | NA |
| Antihypertensive drugs | 1.1 | 1.1 |
| Lipid-lowering drugs | 1.2 | 1.2 |
| Antiplatelet drugs | 1.1 | 1.1 |
| Antidiabetic drugs | 1.4 | 1.4 |
| Regular CPAP treatment | 1.9 | 1.9 |

VIF: variance inflation factors. VIF = 1/(1-R2). VIF step-by-step screening method: Calculate the VIF of each variable. If the maximum VIF value ≥5, remove the variable with the maximum VIF value.

**Table S3.** Hazard ratios and 95% confidence interval (CI) for risk of first myocardial infarction excluding patients on regular CPAP treatment.

| Exposure | HR (95%CI) P-value | | |
| --- | --- | --- | --- |
| Non-adjusted | Model 1 | Model 2 |
| TyG-WC (Per SD increment) | 1.54 (1.37, 1.73) <0.01 | 1.55 (1.38, 1.75) <0.01 | 1.78 (1.46, 2.16) <0.01 |
| TyG-WC (Quartile) |  |  |  |
| Q1 | Reference | Reference | Reference |
| Q2 | 1.62 (1.02, 2.57) 0.04 | 1.59 (1.00, 2.53) 0.05 | 1.73 (1.05, 2.85) 0.03 |
| Q3 | 2.68 (1.75, 4.11) <0.01 | 2.65 (1.72, 4.08) <0.01 | 3.03 (1.83, 5.02) <0.01 |
| Q4 | 3.44 (2.27, 5.20) <0.01 | 3.51 (2.30, 5.35) <0.01 | 4.00 (2.26, 7.07) <0.01 |
| P for trend | <0.01 | <0.01 | <0.01 |
| Data: HR (95% CI) P-value  Non-adjusted model adjust for: none  Adjust model 1 adjust for: age, BMI, diabetes, smoking status, drinking status, SBP, and DBP  Adjust model 2 adjust for: model 1 plus TC, TG, HDL-c, LDL-c, FPG, Hcy, lipid-lowering drugs, antiplatelet drugs, antidiabetic drugs, and antihypertensive drugs. | | | |

**References**

1. Berry RB, Budhiraja R, Gottlieb DJ, et al. Rules for scoring respiratory events in sleep: update of the 2007 AASM Manual for the Scoring of Sleep and Associated Events. Deliberations of the Sleep Apnea Definitions Task Force of the American Academy of Sleep Medicine. *J Clin Sleep Med*. 2012;8:597-619.

2. Rechtschaffen A, Kales A (1968) A manual of standardized terminology, techniques and scoring system for sleep stages of human subjects. National Institutes of Health, Washington DC.

3. Iber C, Ancoli-Israel S, Chesson A (2007) The AASM manual for the scoring of sleep and associated events: rules, terminology, and technical specifications, 1st edn. American Academy of Sleep Medicine, Westchester.

4. Amerian Academy of Sleep Medicine (1992). EEG arousals: scoring rules and examples: a preliminary report from the Sleep Disorders Atlas Task Force of the American Sleep Disorders Association. Sleep, 15(2), 173-84.
